# Supplementary material
Source: Springer Nature journal article supplement (https://www.springermedizin.de/resource/supplementary/13048_2014_280_MOESM4_ESM.pdf/9665274)

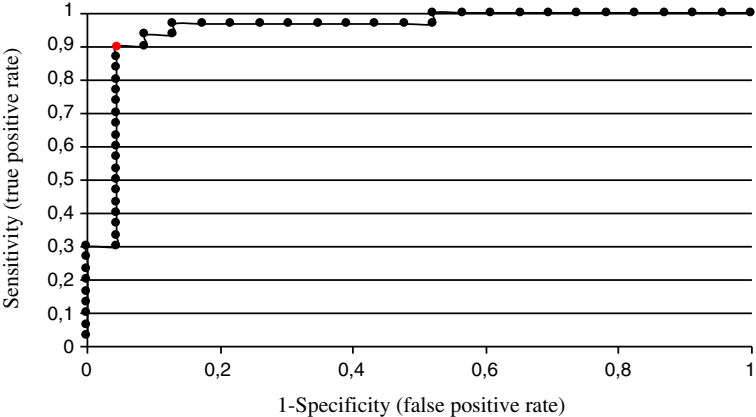

HE4, AUC=0.949

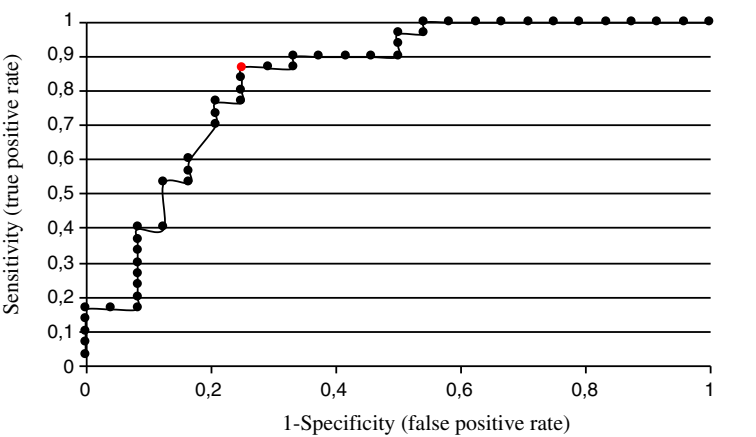

CA125, AUC=0.833

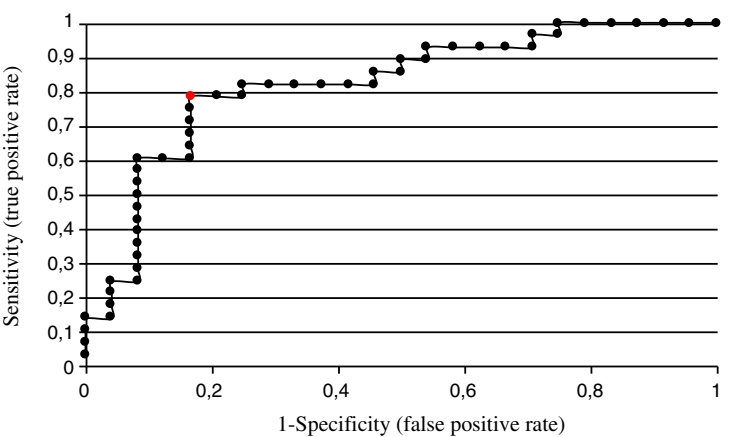

YKL-40, AUC=0.821

Supplement: MOESM4 [file 9665274]
